# Supplementary material
Source: Springer Nature journal article supplement (https://www.springerprofessional.de/resource/supplementary/13638_2011_314_MOESM16_ESM.pdf/11897560)

N° Request Packets

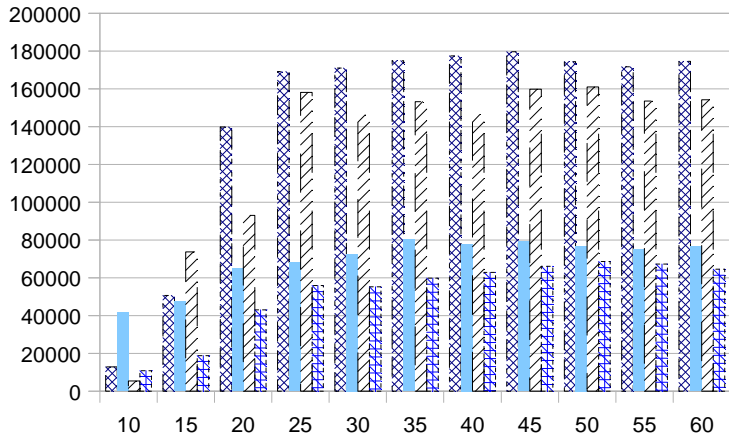

N° Connections

- AODV
- AODV\_CZ
- AODV\_DT
- AODV\_DT\_OFC

Supplement: MOESM16 [file 11897560]
